# Supplementary material for: Echinacea purpurea (L.) Moench Polysaccharide Alleviates DSS-Induced Colitis in Rats by Restoring Th17/Treg Balance and Regulating Intestinal Flora
Source: MDPI journal article supplement (doi:10.3390/foods12234265), 2023-11-25
Supplement: s1 [file s1]

## Supplementary materials

**Table S1 Primer information used in the RT-qPCR**

| Genes          | Forward primer            | Reverse primer            |
|----------------|---------------------------|---------------------------|
| $\beta$ -actin | TCAGGTCATCACTATCGGCAA     | AGCACTGTGTTGGCATAGAGG     |
| Foxp3          | CCCTTTCACCTATGCCACCCT     | TTGTGGCGGATGGCATTCTTC     |
| ROR $\gamma$ t | GAACCAGAACAGGGCTCAGAC     | TAGAAGGTCCTCCAGGCGTAG     |
| IL-17a         | TGAAGGCAGCGGTACTCATC      | GGGTGAAGTGGAACGGTTGA      |
| IL-6           | CTTCCAGCCAGTTGCCTTCTTG    | TGGTCTGTTGTGGGTGGTATCC    |
| IL-23          | AAAAGTGACGTGCCCCGTAT      | CAGACCTTGGCGGATCCTTT      |
| NF- $\kappa$ B | TGTGGTGGAGGACTTGCTGAG     | AGTGCTGCCTTGCTGTTCTTG     |
| MyD88          | CGACGCCTTCATCTGCTACTG     | GCCGATAGTCTGTCTGTTCTAGTTG |
| TLR4           | CTATCATCAGTGTATCGGTGGTCAG | ACAGCCAGCAATAAGTATCAGGTG  |

**Table S2 Retention time of monosaccharide standards**

| Name                | Abbreviations | Retention time |
|---------------------|---------------|----------------|
| Mannose             | Man           | 17.027         |
| D-Galactosamine HCl | GlcN          | 20.167         |
| Rhamnose            | Rha           | 23.677         |
| Glucuronic Acid     | GlcUA         | 24.503         |
| Galacturonic Acid   | GalUA         | 28.123         |
| D-Galactosamine HCl | GalN          | 32.215         |
| Glucose             | Glc           | 34.893         |
| Galactose           | Gal           | 39.578         |
| Xylose              | Xyl           | 41.732         |
| Arabinose           | Ara           | 43.442         |
| Fucose              | Fuc           | 50.422         |

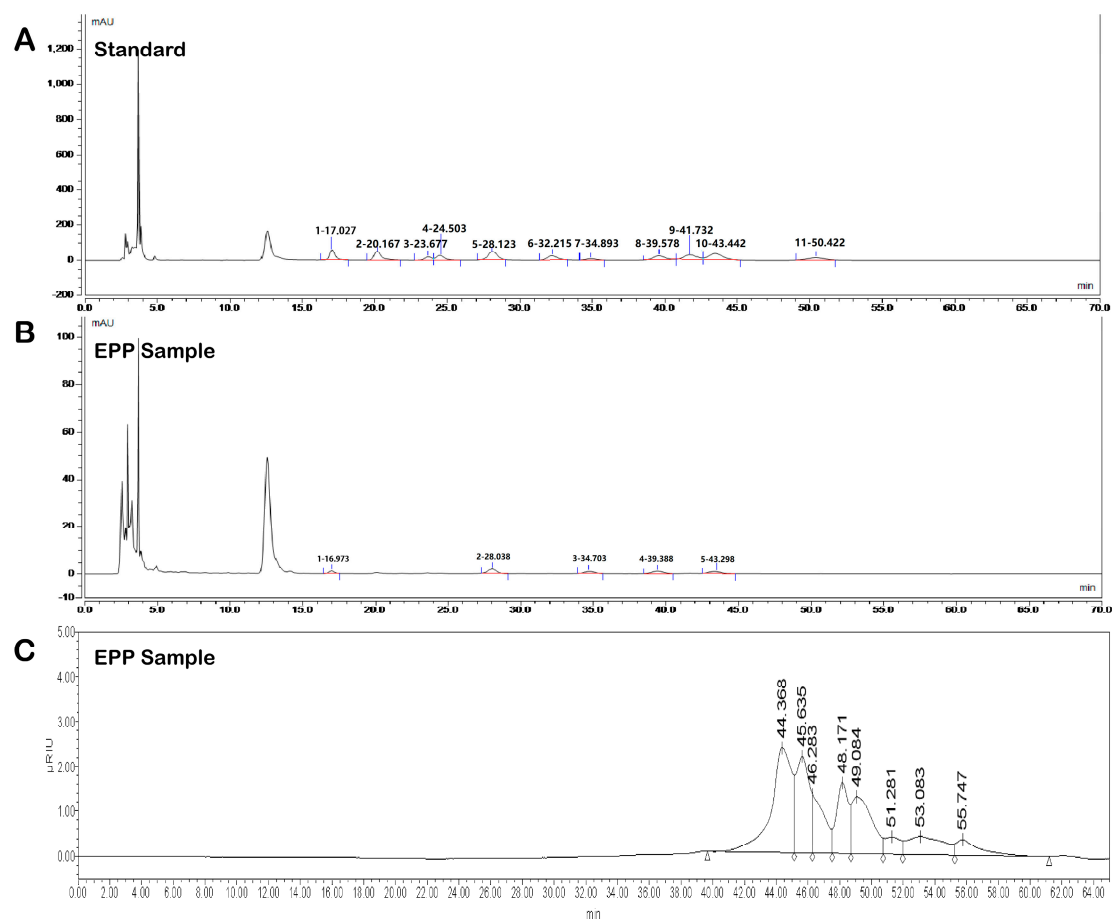

**Figure S1. Determination of monosaccharide composition and molecular weight of EPP.** (A)HPLC of monosaccharide standards. (B)HPLC of EPP sample. (C)HPGPC of EPP sample (The salt peak of mobile phase is near 48.2 min).
